# Supplementary material for: TET-mediated epimutagenesis of the Arabidopsis thaliana methylome
Source: PubMed Central journal article supplement (PMC5832761; doi:10.1038/s41467-018-03289-7), 2018-03-01
Supplement: 41467_2018_3289_MOESM2_ESM.pdf [file 41467_2018_3289_MOESM2_ESM.pdf]

## Description of Supplementary Files

File Name: Supplementary Data 1

Description: **CG methylation levels of transposons in wild type and 35S:TET1 lines.** CG methylation levels were calculated for all annotated transposons in wild type and in 35S:TET1 lines.

File Name: Supplementary Data 2

Description: **CG methylation levels of genes in wild type and 35S:TET1 lines.** CG methylation levels were calculated for all annotated genes in wild type and in 35S:TET1 lines.

File Name: Supplementary Data 3

Description: **TET1 induced DMRs.** Methylation levels (CG, CHG and CHH) for differentially methylated regions (DMRs) identified between wild type and 35S:TET1 lines.

File Name: Supplementary Data 4

Description: **ACT2:TET1 CG DMRs.** CG methylation levels in CG DMRs identified between four ACT2:TET1 T1 lines.

File Name: Supplementary Data 5

Description: **ACT2:TET1 CHG DMRs.** CHG methylation levels in CHG DMRs identified between four ACT2:TET1 T1 lines.

File Name: Supplementary Data 6

Description: **ACT2:TET1 CHH DMRs.** CHH methylation levels in CHH DMRs identified between four ACT2:TET1 T1 lines.
